# Supplementary material for: Gastric gland mucin‐specific O‐glycan expression decreases with tumor progression from precursor lesions to pancreatic cancer
Source: PubMed Central journal article supplement — Cancer Sci. 2017 Aug 8;108(9):1897–902. doi: 10.1111/cas.13317 (PMC5581519; doi:10.1111/cas.13317), 2017-08-08
Supplement: CAS-108-1897-s001.pdf [file CAS-108-1897-s001.pdf]

**Table S1.** Immunohistochemical scores reflecting MUC6 and  $\alpha$ GlcNAc staining in each lesion of 20 cases associated with the PanIN-IDAC sequence.

| Case no. | Low-grade PanIN   |                 | High-grade PanIN/IDS |                 | IDAC |                 |
|----------|-------------------|-----------------|----------------------|-----------------|------|-----------------|
|          | MUC6              | $\alpha$ GlcNAc | MUC6                 | $\alpha$ GlcNAc | MUC6 | $\alpha$ GlcNAc |
| 1        | 3 <sup>†</sup>    | 2               | 1                    | 0               | 1    | 0               |
| 2        | n.e. <sup>‡</sup> | n.e.            | n.e.                 | n.e.            | 1    | 1               |
| 3        | 2                 | 2               | 3                    | 0               | 2    | 0               |
| 4        | 2                 | 1               | 2                    | 1               | 2    | 2               |
| 5        | 1                 | 1               | 2                    | 0               | 1    | 0               |
| 6        | 3                 | 1               | 2                    | 0               | 1    | 1               |
| 7        | 3                 | 2               | 2                    | 2               | 1    | 1               |
| 8        | 3                 | 3               | 1                    | 1               | 1    | 0               |
| 9        | 3                 | 2               | n.e.                 | n.e.            | 1    | 0               |
| 10       | 3                 | 1               | n.e.                 | n.e.            | 0    | 0               |
| 11       | 3                 | 3               | n.e.                 | n.e.            | 1    | 0               |
| 12       | 3                 | 3               | n.e.                 | n.e.            | 2    | 1               |
| 13       | n.e.              | n.e.            | n.e.                 | n.e.            | 0    | 0               |
| 14       | 3                 | 2               | n.e.                 | n.e.            | 1    | 0               |
| 15       | 3                 | 3               | 2                    | 3               | 1    | 1               |
| 16       | 3                 | 2               | 1                    | 1               | 0    | 0               |
| 17       | 1                 | 1               | 1                    | 0               | 0    | 0               |
| 18       | 2                 | 3               | 2                    | 1               | 2    | 1               |
| 19       | 1                 | 1               | 0                    | 0               | 0    | 0               |
| 20       | n.e.              | n.e.            | n.e.                 | n.e.            | 0    | 1               |

<sup>†</sup>Immunohistochemical scores ranged from 0 to 3: 0 ( $\leq 5\%$  positive cells), 1 (6-33% positive cells), 2 (34-66% positive cells) or 3 ( $\geq 67\%$  positive cells).

<sup>‡</sup>n.e. : not evaluated.

**Table S2.** Immunohistochemical scores reflecting MUC6 and  $\alpha$ GlcNAc staining in each lesion of 20 cases associated with the IPMN-IPMNAIC sequence.

| Case no.        | Low-grade IPMN |                 | High-grade IPMN   |                 | IPMNAIC |                 |
|-----------------|----------------|-----------------|-------------------|-----------------|---------|-----------------|
|                 | MUC6           | $\alpha$ GlcNAc | MUC6              | $\alpha$ GlcNAc | MUC6    | $\alpha$ GlcNAc |
| 21 <sup>†</sup> | 2 <sup>‡</sup> | 2               | n.e. <sup>§</sup> | n.e.            | n.e.    | n.e.            |
| 22              | 2              | 2               | 2                 | 2               | 1       | 0               |
| 23              | 3              | 1               | n.e.              | n.e.            | n.e.    | n.e.            |
| 24              | 1              | 1               | 2                 | 0               | n.e.    | n.e.            |
| 25              | 1              | 1               | 0                 | 0               | 0       | 0               |
| 26              | 1              | 2               | 1                 | 1               | 0       | 0               |
| 27              | 2              | 2               | n.e.              | n.e.            | n.e.    | n.e.            |
| 28              | 2              | 1               | n.e.              | n.e.            | n.e.    | n.e.            |
| 29              | 2              | 2               | n.e.              | n.e.            | n.e.    | n.e.            |
| 30              | 2              | 1               | 3                 | 1               | n.e.    | n.e.            |
| 31              | 2              | 1               | n.e.              | n.e.            | n.e.    | n.e.            |
| 32              | 3              | 2               | n.e.              | n.e.            | n.e.    | n.e.            |
| 33              | 3              | 1               | n.e.              | n.e.            | n.e.    | n.e.            |
| 34              | 3              | 1               | n.e.              | n.e.            | n.e.    | n.e.            |
| 35              | 3              | 3               | n.e.              | n.e.            | n.e.    | n.e.            |
| 36              | 2              | 1               | 3                 | 0               | 1       | 0               |
| 37              | 3              | 3               | 0                 | 0               | 0       | 0               |
| 38              | 1              | 1               | 2                 | 1               | 1       | 0               |
| 39              | n.e.           | n.e.            | 1                 | 0               | 0       | 0               |
| 40              | 0              | 0               | 0                 | 1               | 0       | 0               |

<sup>†</sup>Case numbers are continued from Table S1.

<sup>‡</sup>Immunohistochemical scores ranged from 0 to 3: 0 ( $\leq 5\%$  positive cells), 1 (6-33% positive cells), 2 (34-66% positive cells) or 3 ( $\geq 67\%$  positive cells).

<sup>§</sup>n.e.: not evaluated.

**Table S3.** Morphological subclassification of low-grade IPMN lesions and high-grade IPMN lesions in 20 cases in IPMN-IPMNAIC sequence.

| Case no.        | Low-grade IPMN                  | High-grade IPMN                    |
|-----------------|---------------------------------|------------------------------------|
|                 | Morphological subclassification | Morphological subclassification    |
| 21 <sup>†</sup> | gastric-type <sup>‡</sup>       | n.e. <sup>§</sup>                  |
| 22              | gastric-type                    | gastric-type                       |
| 23              | gastric-type                    | n.e.                               |
| 24              | gastric-type                    | pancreatobiliary-type <sup>¶</sup> |
| 25              | gastric-type                    | pancreatobiliary-type              |
| 26              | gastric-type                    | pancreatobiliary-type              |
| 27              | gastric-type                    | n.e.                               |
| 28              | gastric-type                    | n.e.                               |
| 29              | gastric-type                    | n.e.                               |
| 30              | gastric-type                    | pancreatobiliary-type              |
| 31              | gastric-type                    | n.e.                               |
| 32              | gastric-type                    | n.e.                               |
| 33              | gastric-type                    | n.e.                               |
| 34              | gastric-type                    | n.e.                               |
| 35              | gastric-type                    | n.e.                               |
| 36              | gastric-type                    | gastric-type                       |
| 37              | gastric-type                    | pancreatobiliary-type              |
| 38              | gastric-type                    | pancreatobiliary-type              |
| 39              | n.e.                            | pancreatobiliary-type              |
| 40              | gastric-type                    | pancreatobiliary-type              |

<sup>†</sup>Case numbers are continued from Table S1.

<sup>‡</sup>gastric-type: gastric-type IPMN.

<sup>§</sup>n.e.: not evaluated.

<sup>¶</sup>pancreatobiliary-type: pancreatobiliary-type IPMN.

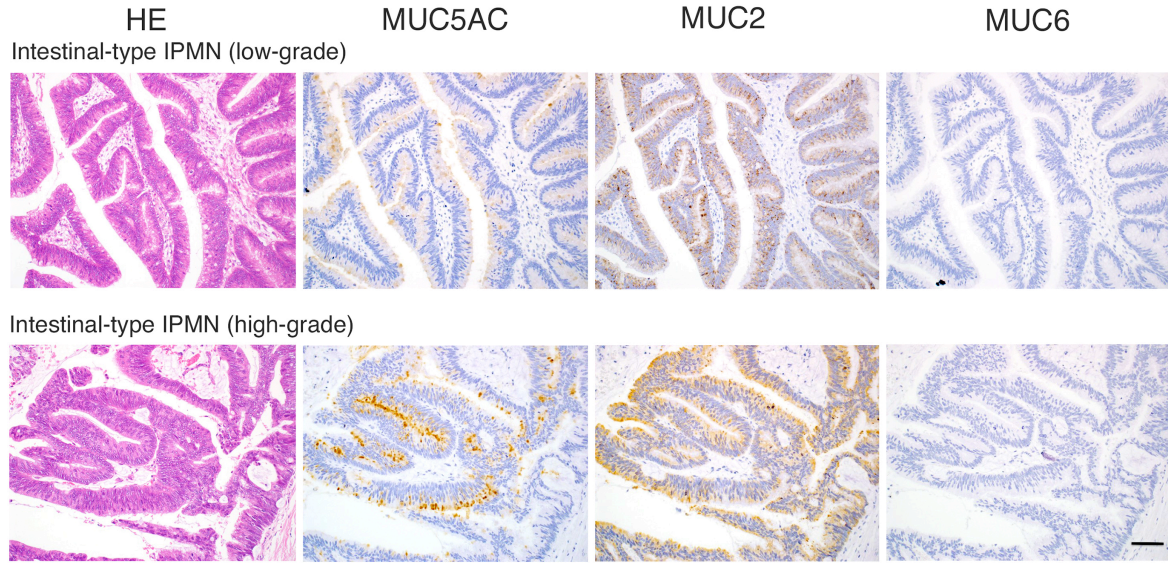

**Fig. S1.** Immunohistochemical expression of MUC5AC, MUC2, and MUC6 in intestinal-type IPMN. MUC5AC and MUC2 are expressed in tumor cells of intestinal-type IPMN, irrespective of histological grade. By contrast, MUC6 is not detected in the tumor cells. Primary antibody used for MUC2 immunohistochemistry was anti-MUC2 antibody (clone Ccp58, mouse IgG, Novocastra). Information about anti-MUC5AC and anti-MUC6 antibodies was provided in the main text. HE, hematoxylin and eosin staining. Bar = 100  $\mu$ m.
